# Supplementary material for: A total quasi-steady-state formulation of substrate uptake kinetics in complex networks and an example application to microbial litter decomposition
Source: Copernicus journal article supplement (doi:10.5194/bg-10-8329-2013), 2013-12-16
Supplement: Supplementary file 1 [file bg-10-8329-2013-supplement.pdf]

1 **Supplemental material for “A total quasi-steady-state**  
2 **formulation of substrate uptake kinetics in complex**  
3 **networks and an example application to microbial litter**  
4 **decomposition”**

5

6 **J. Y. Tang and W. J. Riley**

7 Earth Science Division, Lawrence Berkeley National Laboratory (LBL), Berkeley, CA,  
8 United States

9

10

11 Correspondence to: J. Y. Tang ([jinyuntang@lbl.gov](mailto:jinyuntang@lbl.gov))

12

13

14

15

16

17

18

19

20

21

22

23

24

25

26

27

1 **S1. Derivation Eq. (A6-b)**

2 Substituting Eq. (A4) into Eq. (12) and taking the zero order approximation

3  $E_{k,0} = E_{k,T}$ , yields

$$4 \quad E_{k,1} + \sum_{l=1}^{l=I} C_{lk,1} = 0 \quad (S1-1)$$

5 Dividing Eq. (S1-1) by  $K_{S,ik}$  and taking the summation for  $k = 1, \dots, J$ , we obtain:

$$6 \quad \sum_{k=1}^{k=J} \frac{E_{k,1}}{K_{S,ik}} = - \sum_{k=1, l=1}^{k=J, l=I} \frac{C_{lk,1}}{K_{S,ik}} \quad (S1-2)$$

7 Similarly, from Eqs. (A4) and (10), one has

$$8 \quad \sum_{k=1}^{k=I} \frac{S_{k,1}}{K_{S,kj}} = - \sum_{k=1, l=1}^{k=I, l=J} \frac{C_{kl,1}}{K_{S,kj}} \quad (S1-3)$$

9 Substitution of Eq. (S1-2) and (S1-3) into Eq. (A5-b) leads to

$$10 \quad C_{ij,2} \left( 1 + \sum_{k=1}^{k=J} \frac{E_{k,0}}{K_{S,ik}} + \sum_{k=1}^{k=I} \frac{S_{k,0}}{K_{S,kj}} \right) = C_{ij,1} \left( \sum_{l=1, n=1}^{n=I, l=J} \frac{C_{nl,1}}{K_{S,il}} + \sum_{k=1, l=1}^{n=I, l=J} \frac{C_{nl,1}}{K_{S,nj}} - \sum_{n=1, l=1}^{n=I, l=J} \frac{K_{S,nl} C_{nl,1}}{K_{S,il} K_{S,nj}} \right) \quad (S1-4)$$

11 from which Eq. (A6-b) can be derived.

12

13 **S2. A synthetic isotope experiment with model S3B1**

14 We applied model S3B1 with the parameter values in Table S1 for a synthetic  
 15 isotope simulation. From the initial condition, we define the reference isotopic mass  
 16 fractions for substrate  $S_i, i = 2, 3$  as

$$17 \quad R_{S_i,0} = \frac{S_i}{\sum_{k=1}^{k=3} S_k} \quad (S2-1)$$

18 At any point in time, the isotope ratio of substrate  $S_i, i = 2, 3$  is calculated as

$$19 \quad \delta S_i (\text{per mil}) = \left( \frac{R_{S_i}}{R_{S_i,0}} - 1 \right) \times 1000 \quad (S2-2)$$

20

21

1 **References**

2 Aber, J. D., McLaugherty, C. A. and Melillo, J. M.: Litter decomposition in Wisconsin  
3 forests: mass loss, organic-chemical constituents and nitrogen. Report #R3284,  
4 School of Natural Resources, University of Wisconsin, Madison, Wisconsin, USA,  
5 1984

6 Magill, A. H., and Aber, J. D.: Long-term effects of experimental nitrogen additions on  
7 foliar litter decay and humus formation in forest ecosystems, *Plant Soil*, 203, 301-  
8 311, doi: 10.1023/A:1004367000041, 1998.

9

10

11

12

13

14

15

16

17

18

19

20

21

22

23

24

25

26

27

28

29

30

31

1 List of Tables

2

3 Table S1. Parameter values for the synthetic-isotope experiment with model S3B1.

4 The parameter vectors are presented in the form  $(K_{S,ij}, k_{ij,2}^+, \mu_{ij})$ , whose units are,  
5 respectively,  $\text{mg C dm}^{-3}$ ,  $\text{d}^{-1}$ , and none. The numbers in parentheses following the  
6 state variables are their initial values, whose units are  $\text{mg C dm}^{-3}$ . The respiration  
7 rate  $\gamma_1$  is set to  $0.03 \text{ d}^{-1}$ . The parameters for the substrate kinetics were randomly  
8 chosen as in the main text.

|           | $S_1$ (30)  | $S_2$ (0.6)      | $S_3$ (0.4)      |
|-----------|-------------|------------------|------------------|
| $B_1$ (1) | (20,48,0.5) | (19.6,47.84,0.3) | (18.8,47.72,0.1) |

9

10 Table S2. Best-fit parameters for model S3B3-MM (S3B3 model implemented with M  
11 kinetics) by optimizing the simulation outputs to the 77-month red pine litter  
12 decomposition experiment data in Melillo et al. (1989). The parameter vectors are  
13 presented in the form  $(K_{S,ij}, k_{ij,2}^+, \mu_{ij})$ , whose units are, respectively,  $\text{g C}$ ,  $\text{d}^{-1}$ , and none.  
14 The respiratory coefficients (i.e.,  $\gamma_j, j = 1, 2, 3$  as defined in Eq. (30)) of the three  
15 microbes are, respectively, 0.01, 0.005, and  $0.001 \text{ d}^{-1}$ . Numbers in the parentheses  
16 following the state variables are their initial values, whose units are  $\text{g C}$ . In doing the  
17 calibration, we assumed (i)  $K_{S,1j}, j = 1, 2, 3$  are the same for all three microbes; (ii)  
18  $K_{S,22} = K_{S,23}$ ; and (iii) for microbe  $B_j$ ,  $k_{ij,2}^+, i = 1, 2, 3$  are the same for all three  
19 substrates. By further fixing  $\mu_{ij}$  to the values in the parentheses, we effectively had  
20 9 total parameters in the calibration.

|       | $S_1$ (359)        | $S_2$ (386)         | $S_3$ (255)         |
|-------|--------------------|---------------------|---------------------|
| $B_1$ | (48.12,0.5886,0.5) | (94.39,0.5886,0.3)  | (1964.5,0.5886,0.1) |
| $B_2$ | (48.12,0.3995,0.5) | (182.26,0.3995,0.3) | (1946.2,0.3995,0.1) |
| $B_3$ | (48.12,0.3913,0.5) | (182.26,0.3913,0.3) | (180.2,0.3913,0.1)  |

21

22

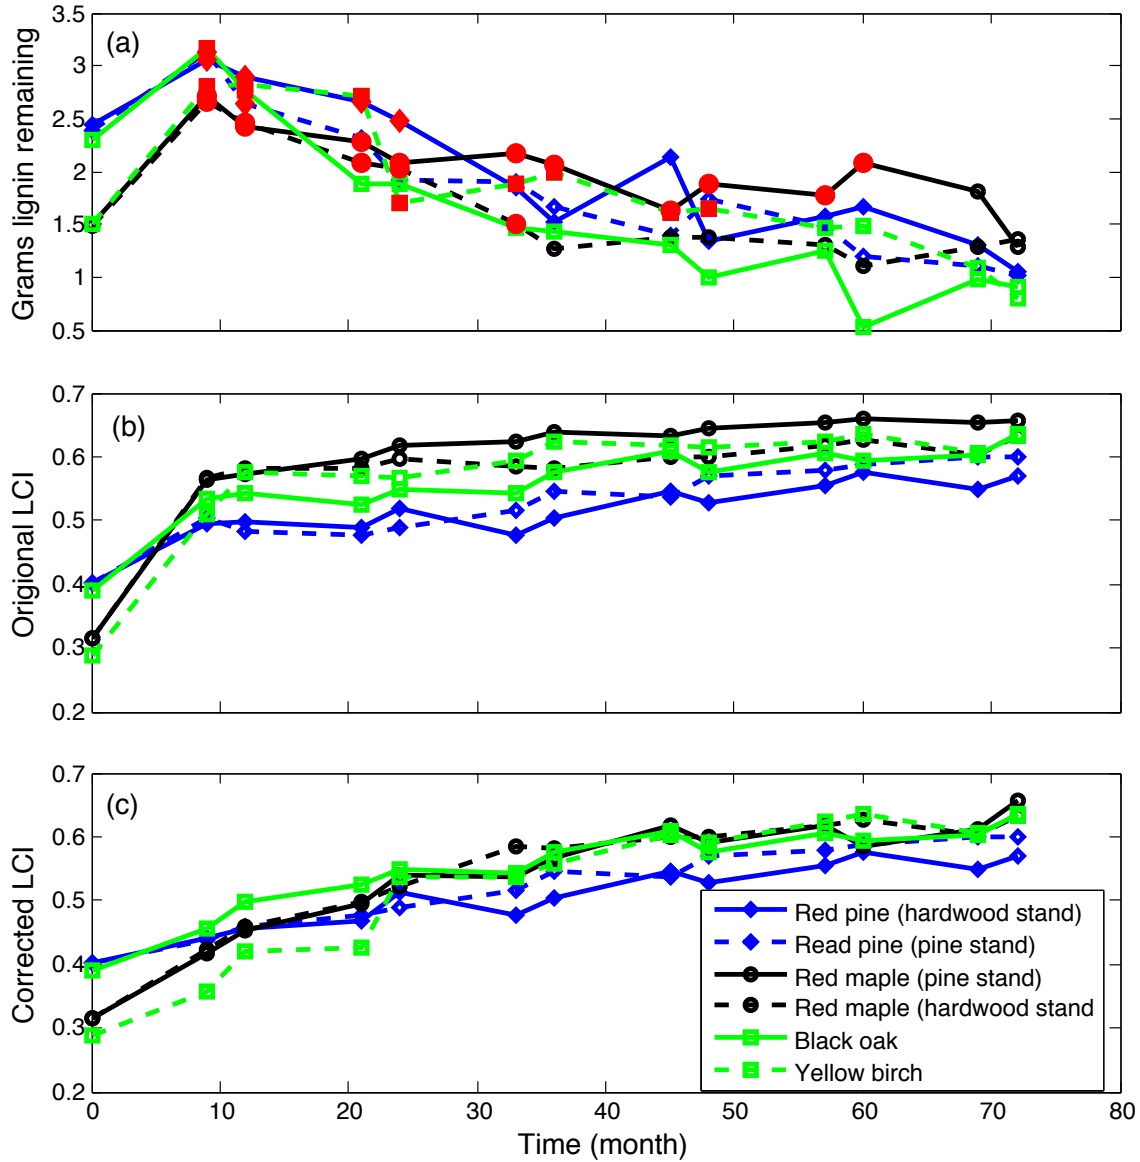

1  
 2 Figure S1. Evolution of lignin in the decomposition experiments documented in  
 3 Magill et al. (1998). The corrected LCI in panel (c) is derived by replacing the  
 4 unreasonable lignin data (marked in red) reported in Magill et al. (1998) (that are higher  
 5 than the initial lignin mass) with the initial lignin mass. We corrected 32 out of 78 (about  
 6 40%) data points.  
 7

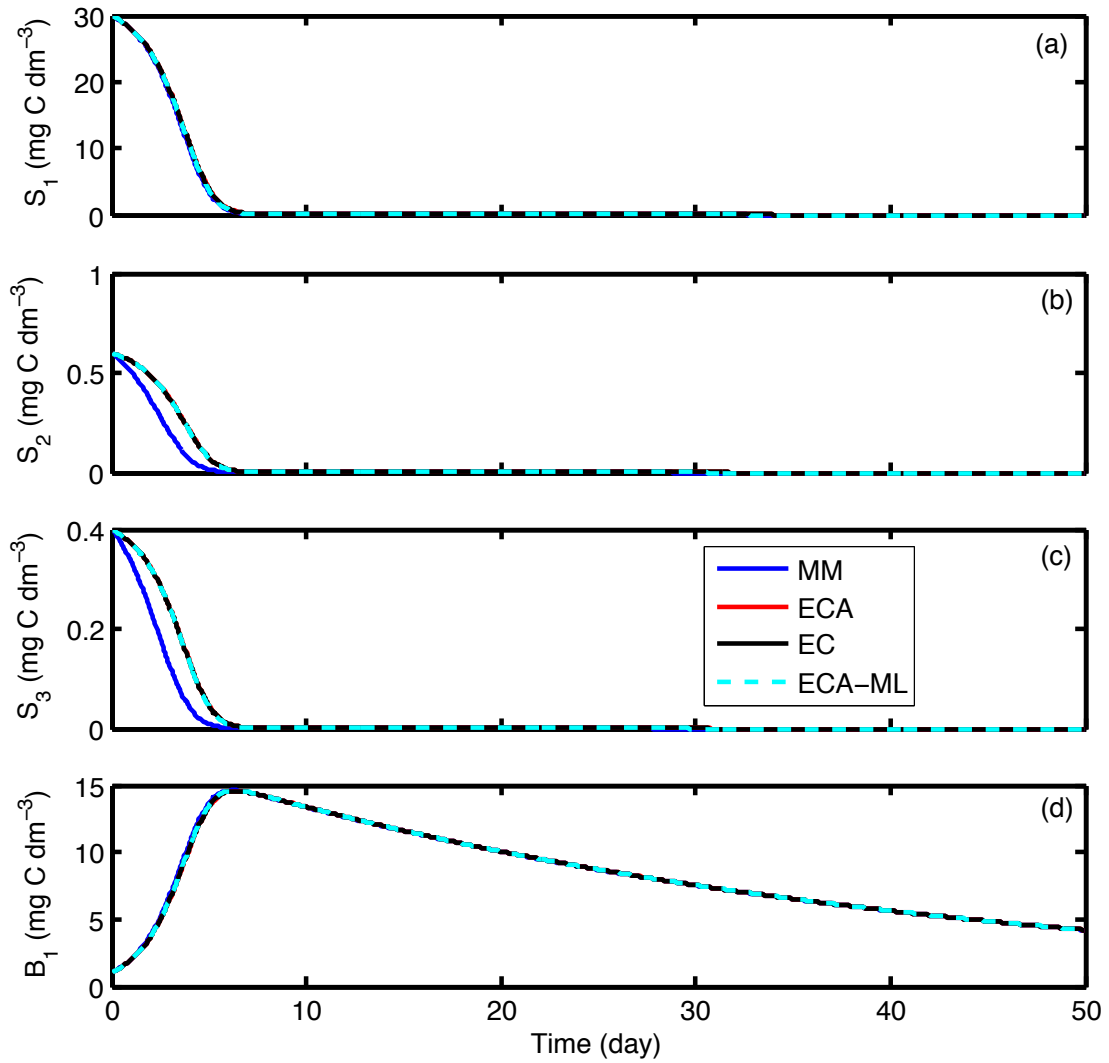

1  
2 Figure S2. Time series of relevant state variables simulated from the synthetic-  
3 isotope simulation experiment by applying the three different substrate uptake  
4 functions to microbial model S3B1. Relevant parameters are specified in Table S1.

5  
6  
7  
8  
9  
10  
11  
12  
13  
14  
15  
16  
17

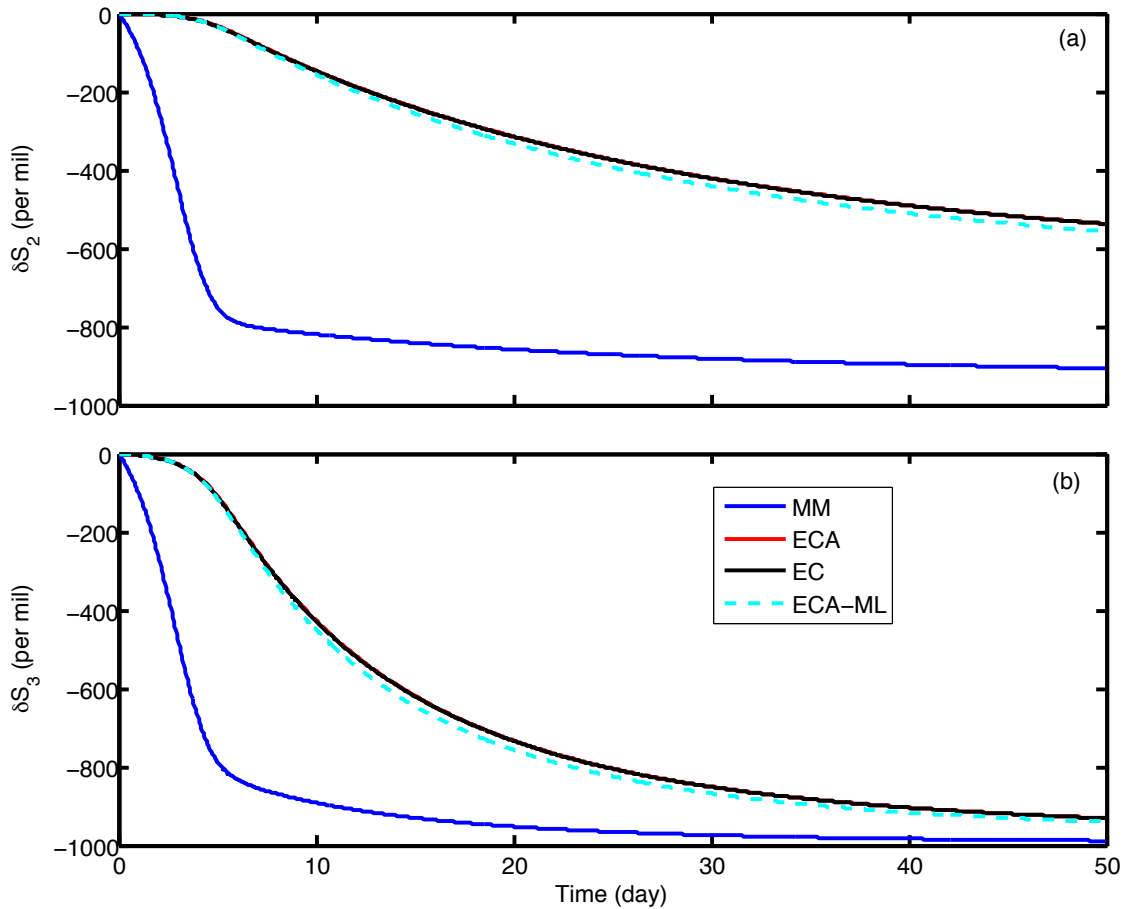

Figure S3. Temporal evolution of the synthetic-isotopic signatures of pool S2 and S3 simulated from model S3B1 using different substrate uptake functions. Relevant parameters are specified in Table S1.

1  
2  
3  
4  
5  
6  
7  
8  
9  
10  
11  
12  
13  
14  
15  
16  
17  
18  
19  
20  
21  
22

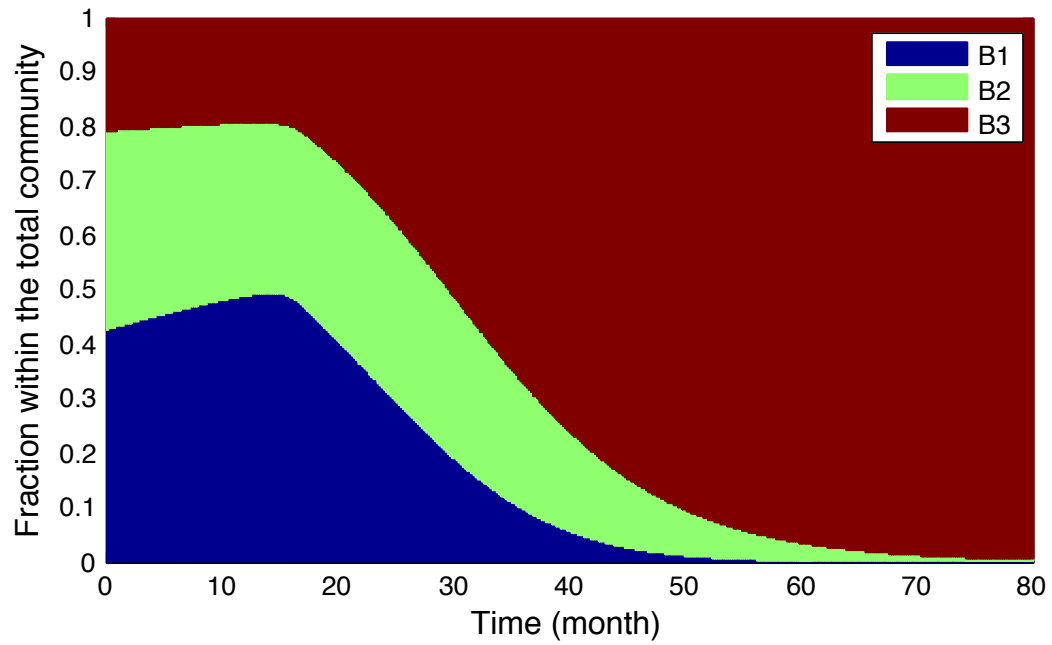

1  
 2 Figure S4. Model (S3B3-ECA) predicted microbial community structure for the 77-  
 3 month litterbag experiment. Relevant model parameters are in Table 5.  
 4  
 5  
 6  
 7  
 8  
 9  
 10  
 11



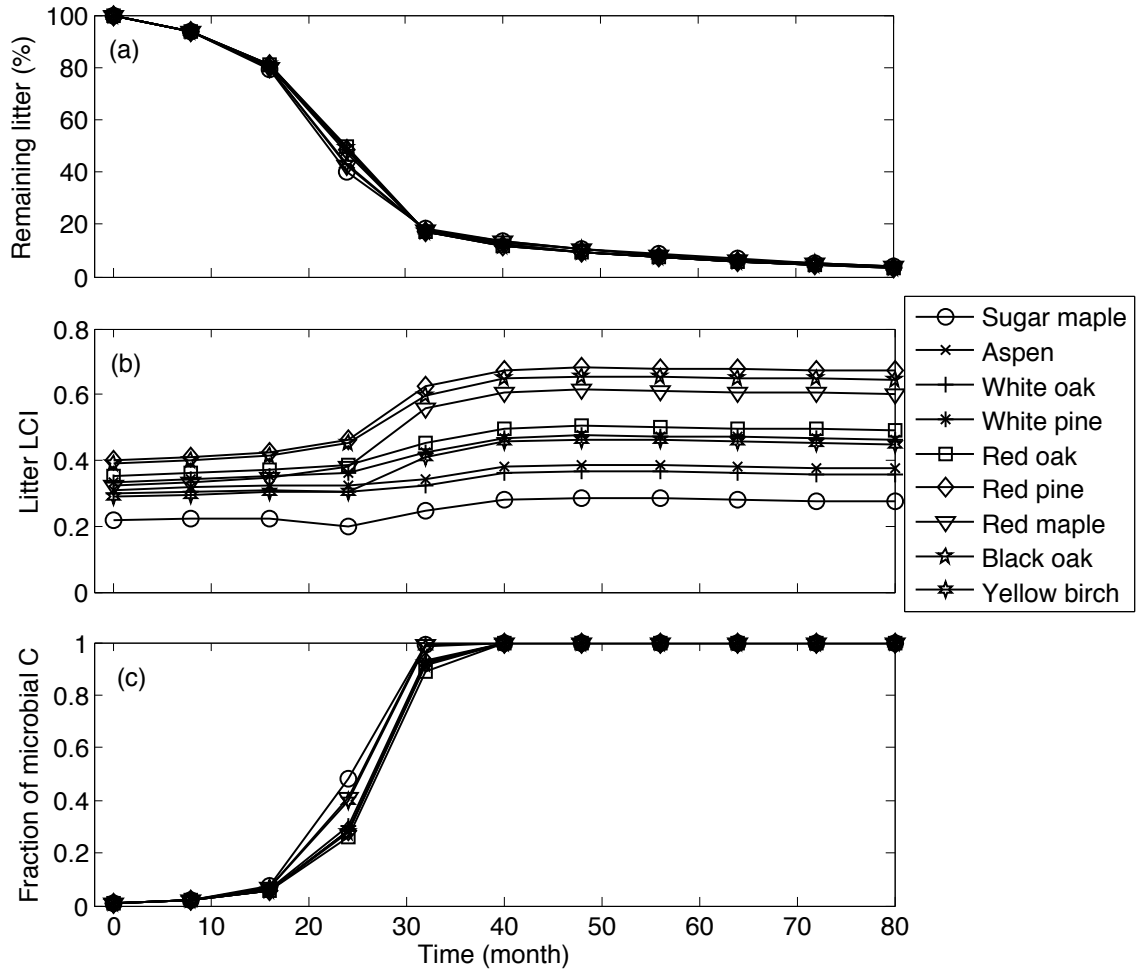

1  
 2 Figure S5. Model (S3B3-MM: models S3B3 implemented with MM kinetics) predicted  
 3 temporal evolution of litter decomposition dynamics for the 9 different litters in Table 4.  
 4 Model parameters are in Table S2.

5  
 6  
 7
